# Supplementary material
Source: Springer Nature journal article supplement (https://www.springermedizin.de/resource/supplementary/12958_2004_148_MOESM6_ESM.pdf/9567252)
Supplement: MOESM6 [file 9567252]

Percent Inhibition

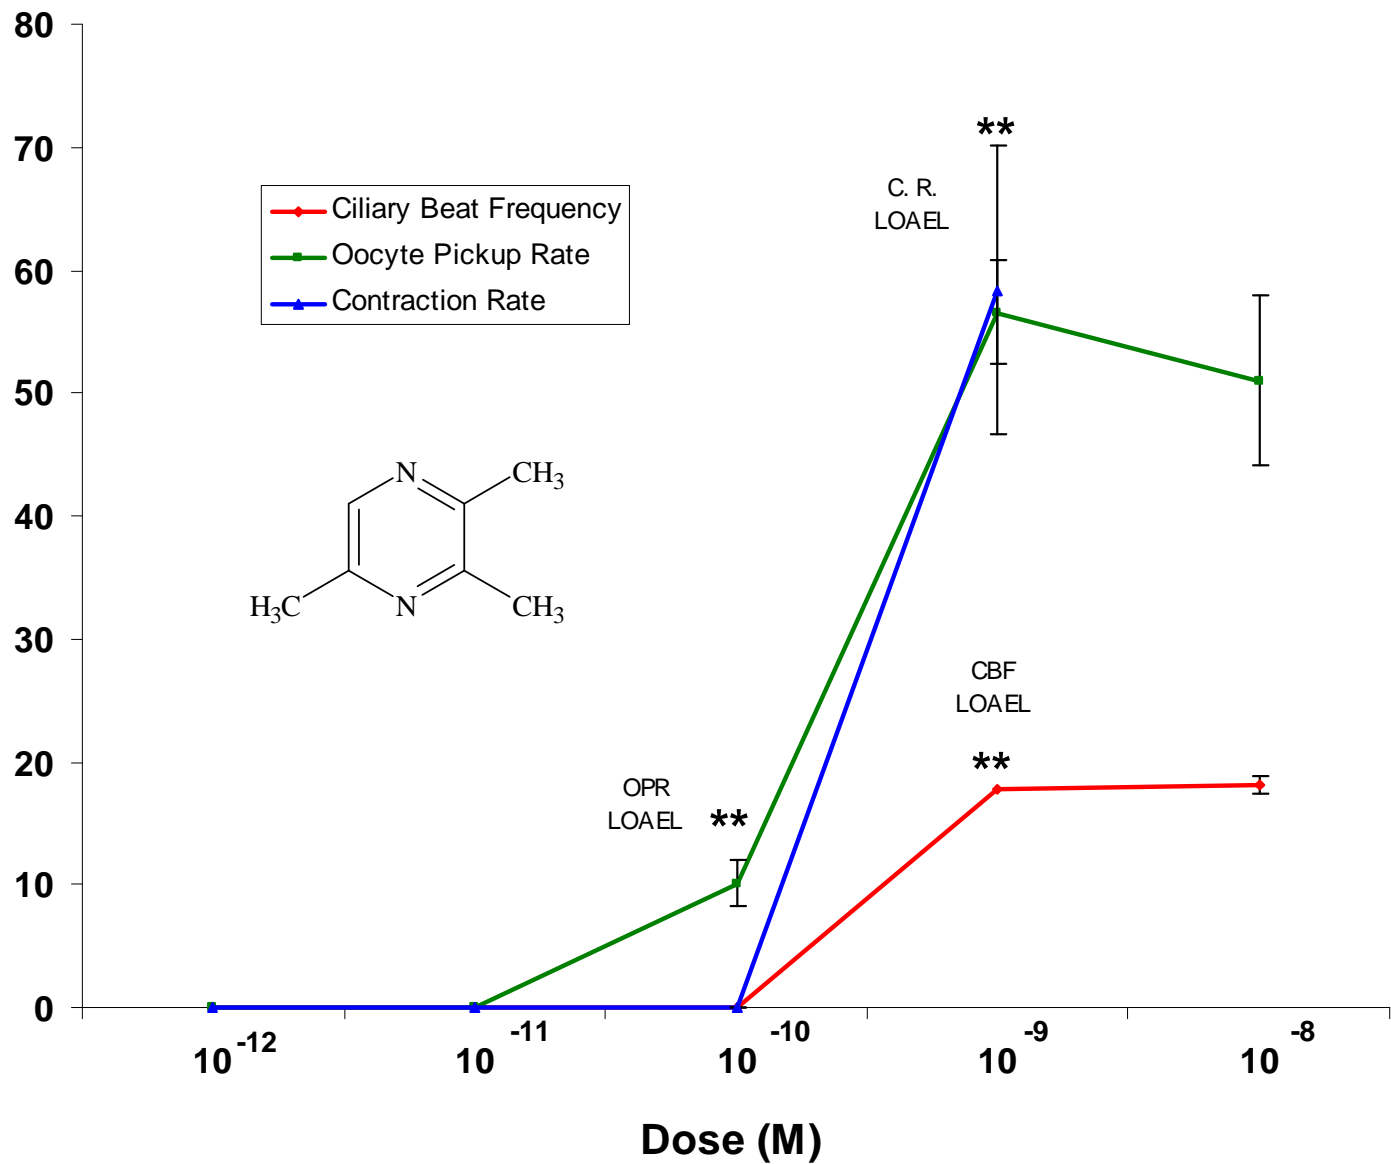

- Ciliary Beat Frequency
- Oocyte Pickup Rate
- Contraction Rate

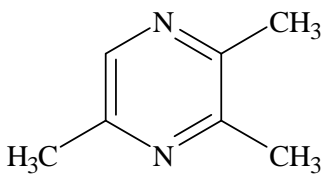

OPR  
LOAEL

\*\*

C. R.  
LOAEL

CBF  
LOAEL

\*\*

\*\*
